# Supplementary figures and images for: Oral Microbial Signature of Rheumatoid Arthritis in Female Patients
Source: MDPI journal article supplement (doi:10.3390/jcm12113694), 2023-05-26

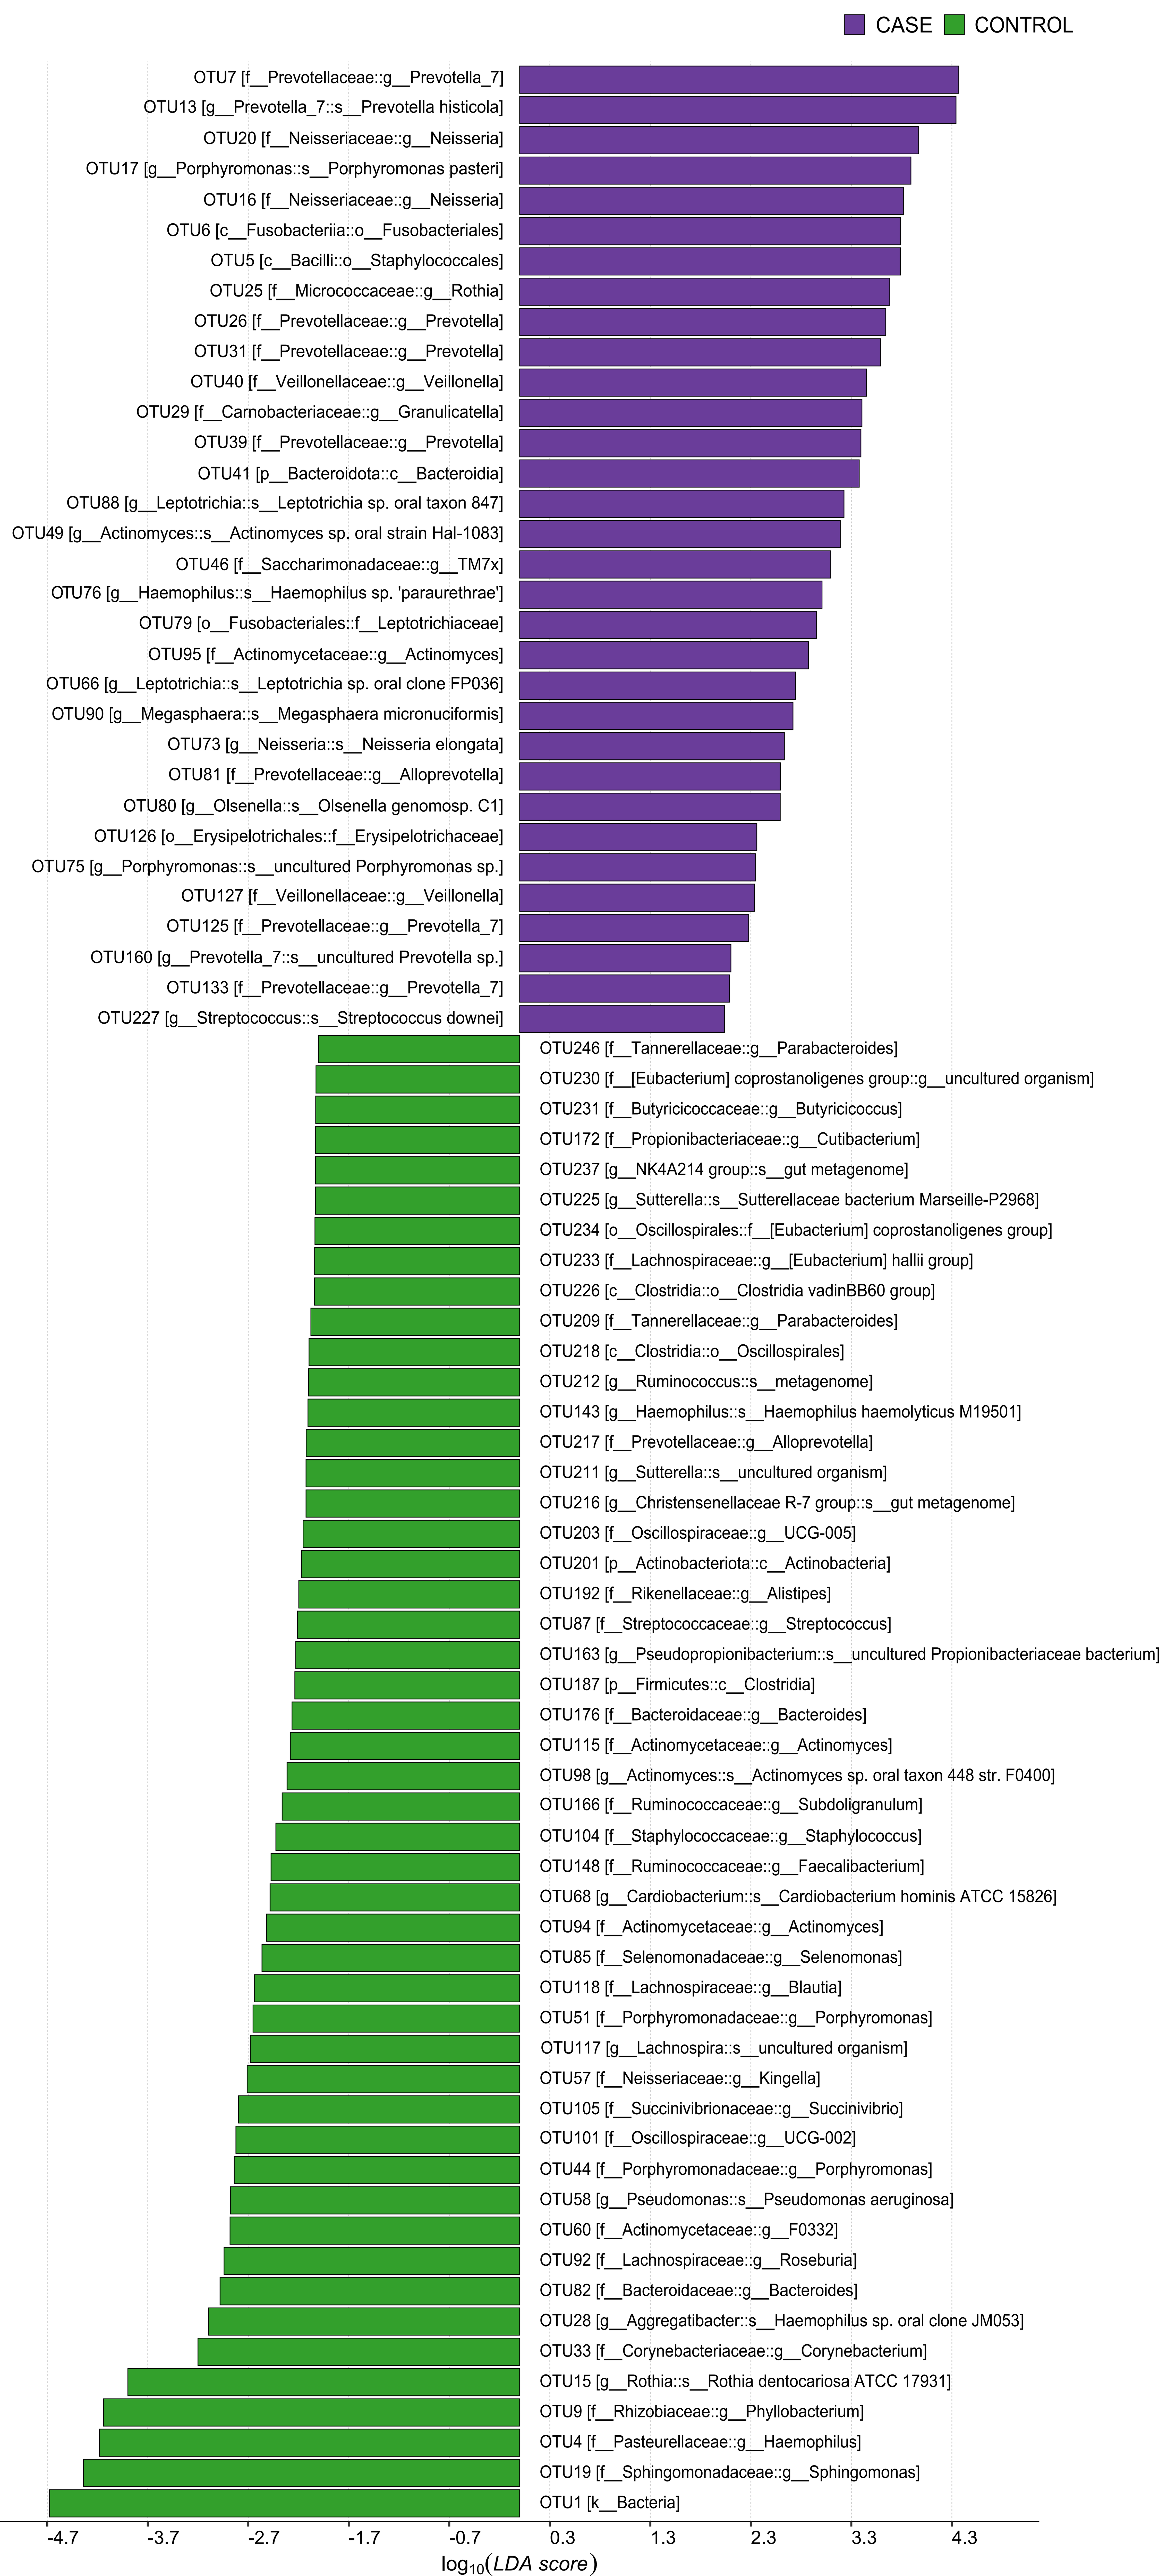

Supplement: s1 [file s1]
